# Supplementary material
Source: PubMed Central journal article supplement (PMC7049951)
Supplement: supp_RA119.010719_155312_1_supp_466077_q4vkjs.pdf [file supp_RA119.010719_155312_1_supp_466077_q4vkjs.pdf]

## **Supporting Information**

The regulatory proteins DSCR6 and Ezh2 oppositely regulate Stat3 transcriptional activity in mesoderm patterning during *Xenopus* development

**Mafalda Loreti, De-Li Shi\*, and Clémence Carron\***

From the Sorbonne Université, CNRS UMR7622, IBPS-Developmental Biology Laboratory,  
75005 Paris, France

\*Authors for correspondence (Email: [de-li.shi@upmc.fr](mailto:de-li.shi@upmc.fr) or [clemence.carron\\_homo@upmc.fr](mailto:clemence.carron_homo@upmc.fr))

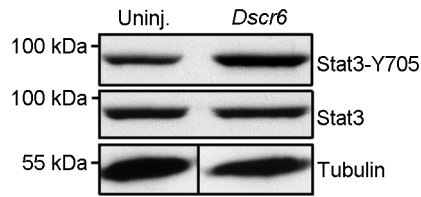

**FIGURE S1. DSCR6 does not change Stat3 phosphorylation.** Western blot analysis shows the expression level of Stat3-Y705P and total Stat3 in uninjected (uninj.) and *Dscr6* injected embryos at early gastrula stage. Tubulin is a loading control, and the protein bands were spliced from the corresponding lanes.

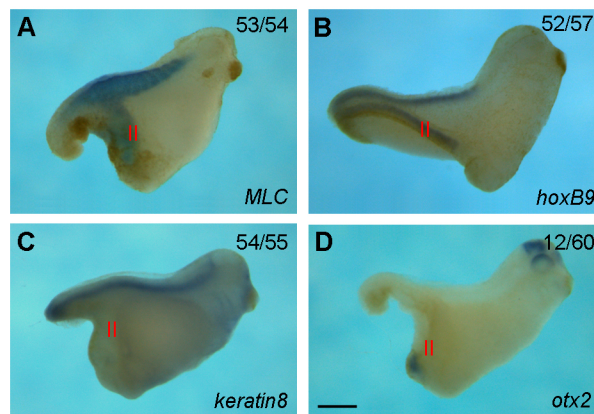

**FIGURE S2. Characterization of Ezh2-H694L-induced secondary axis by in situ hybridization.** (A) Somite marker. (B) Spinal cord marker. (C) Notochord marker. (D) Forebrain marker. Scale bar: (A-D) 500  $\mu\text{m}$ .

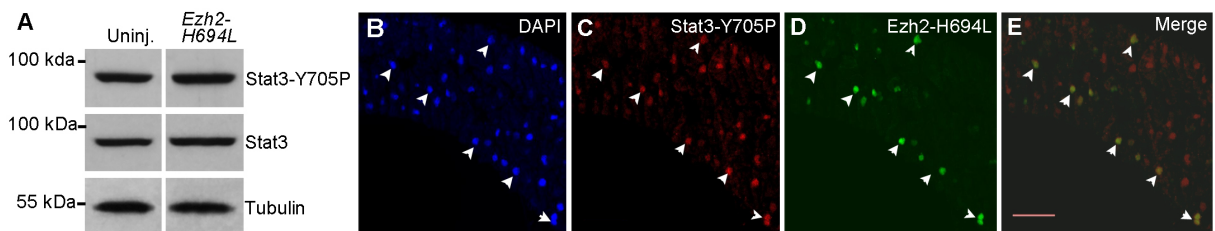

**FIGURE S3. Ezh2-H694L does not affect Stat3 phosphorylation and nuclear localization.** (A) Western blot analysis shows the expression level of Stat3-Y705P and total Stat3 in uninjected and *Ezh2-H694L*-injected embryos at early gastrula stage. Tubulin is a loading control. (B-E) Nuclear localization (arrowheads) of Stat3-Y705P in *Ezh2-H694L*-injected embryos. Scale bar: (B-E) 50  $\mu\text{m}$ .

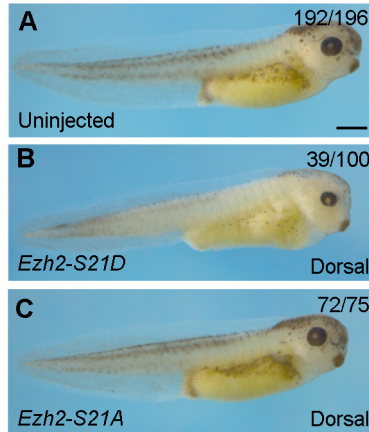

**FIGURE S4. Differential effects of Ezh2-S21D and Ezh2-S21A on head development.** (A) An uninjected larval stage embryo (stage 40). (B) Dorsal expression of Ezh2-S21D produces anterior deficiency. (C) Dorsal expression of Ezh2-S21A has no effect. Scale bar: (A-C) 500  $\mu$ m.

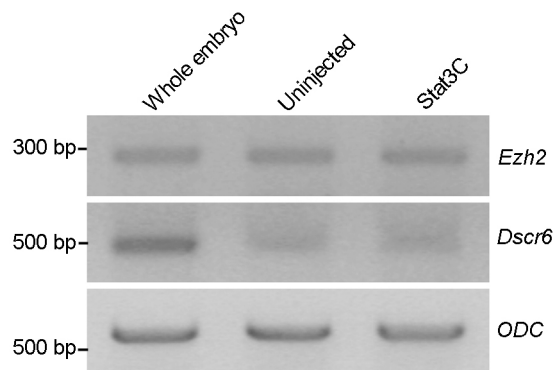

**FIGURE S5. Stat3 does not affect Ezh2 and Dscr6 expression.** RT-PCR analysis of ectoderm explants expressing Stat3C. The expression of *Ezh2* and *Dscr6* is unchanged at early gastrula stages. *Ornithine decarboxylase* (*ODC*) is an input control.
